# Supplementary material for: 1H-NMR-Based Analysis for Exploring Knee Synovial Fluid Metabolite Changes after Local Cryotherapy in Knee Arthritis Patients
Source: MDPI journal article supplement (doi:10.3390/metabo10110460), 2020-11-13
Supplement: s1 [file s1]

## Supplementary data for “<sup>1</sup>H-NMR-based analysis for exploring knee synovial fluid metabolite changes after local cryotherapy in knee arthritis patients”

### **SD1 – Method for multivariate analysis**

Multivariate analysis was performed on spectra from aqueous sample and organic extract individually. For each type of sample, two bucketing methods were conducted to generate two data matrices: (1) Automatic bucketing : bucket width 0.05 ppm, normalized to the total integral of all individual (from 0.6 to 10 ppm with exclusion of water signal from 4.4 to 5.6 ppm for aqueous samples and from 0.6 to 10 ppm with exclusion of chloroform signal from 7.0 to 8.0 ppm for organic extracts). We used Amix viewer from Bruker® to generate matrices (2) Manual bucketing with integration of isolated and identified signals related to TSP signal. We used TopSpin 4.0.8 software (Bruker BioSpin®). We used a Pareto scaling before generating the score and loading plots from PCA and PLS-DA using Simca-P 11 software from Umetrics®.

Supplementary data for “<sup>1</sup>H-NMR-based analysis for exploring knee synovial fluid metabolite changes after local cryotherapy in knee arthritis patients”

**SD2 Multivariate analysis results on aqueous samples from automatic bucketing**

- (a) PCA score plot
- (b) PCA loading plot
- (c) PLS-DA score plot
- (d) PLS-DA loading plot

# Supplementary data for “<sup>1</sup>H-NMR-based analysis for exploring knee synovial fluid metabolite changes after local cryotherapy in knee arthritis patients”

(a)

LS\_aqueux\_0,05.M7 (PCA-X), cryo J0 vs J1- sans 4,4 à 5,6 ppm  
t[Comp. 1]/t[Comp. 2]  
Colored according to classes in M7

● Day-0  
\* Day-1

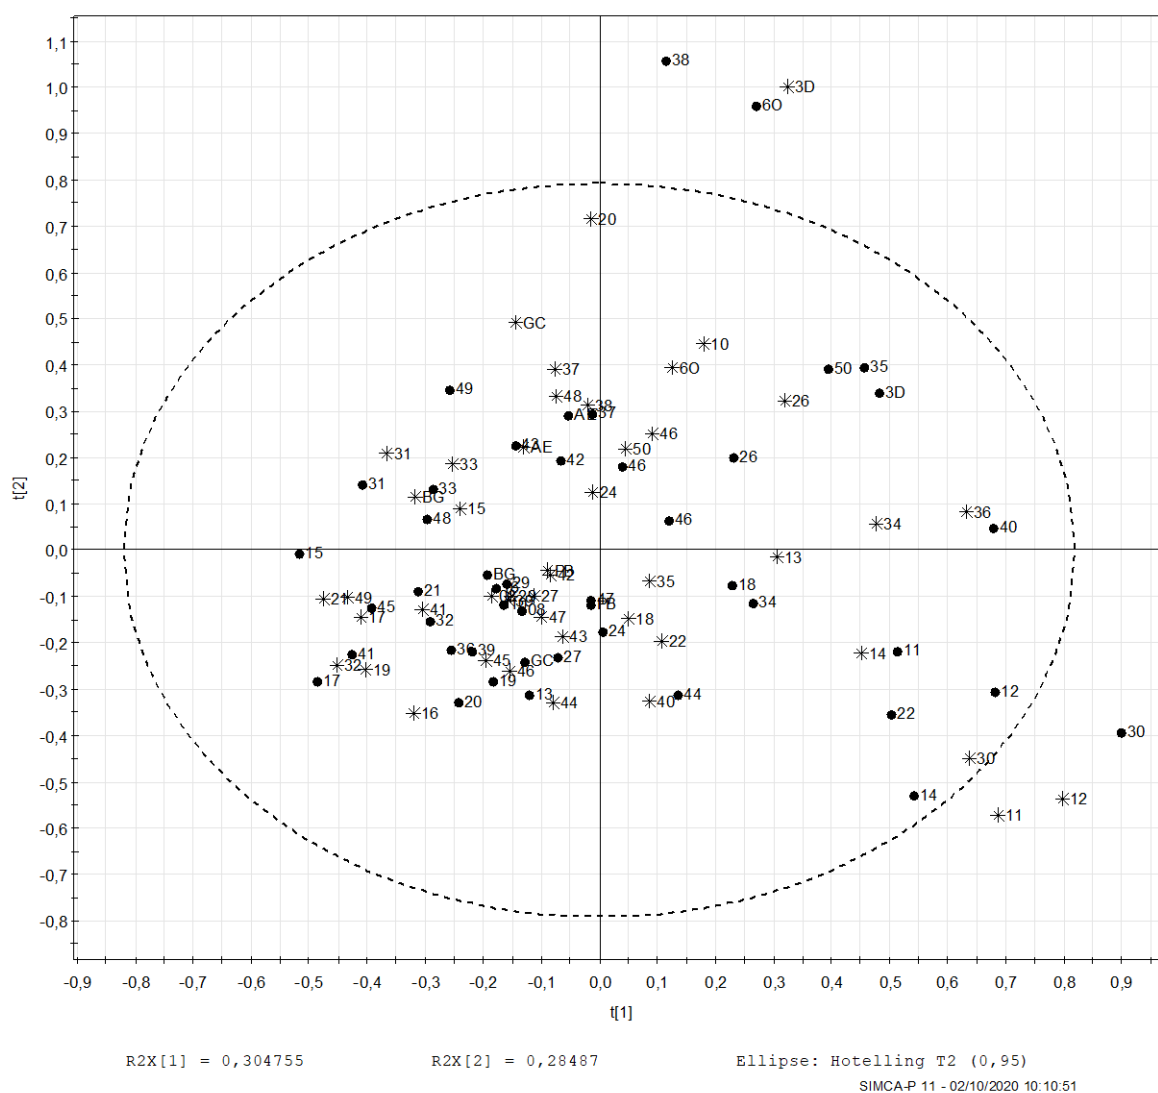

# Supplementary data for “<sup>1</sup>H-NMR-based analysis for exploring knee synovial fluid metabolite changes after local cryotherapy in knee arthritis patients”

(b)

LS\_aqueux\_0,05.M7 (PCA-X), cryo J0 vs J1- sans 4,4 à 5,6 ppm  
p[Comp. 1]/p[Comp. 2]

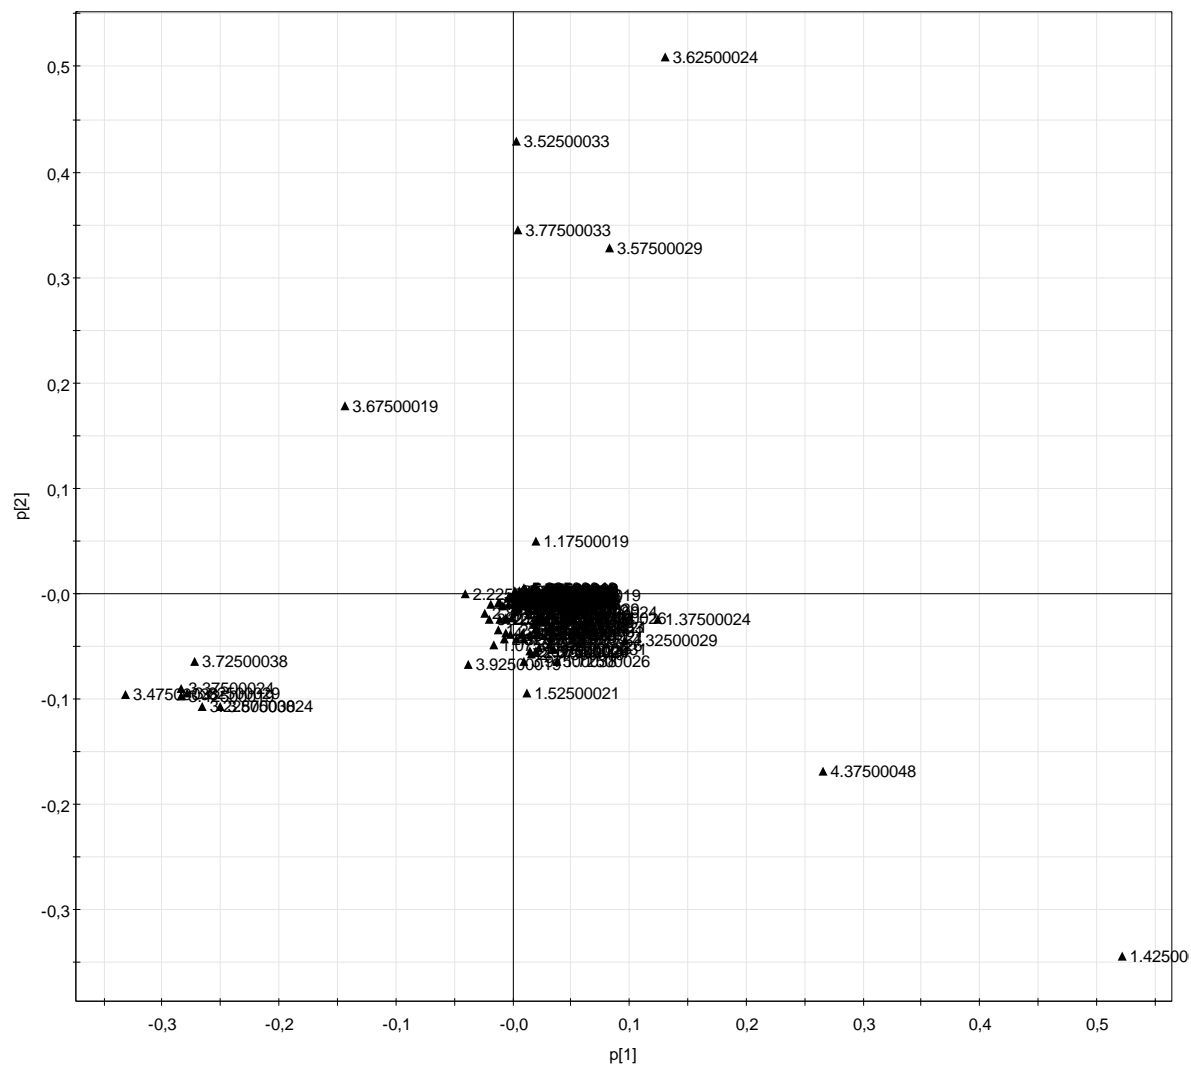

R2X[1] = 0,304755 R2X[2] = 0,28487

SIMCA-P 11 - 02/10/2020 10:11:22

# Supplementary data for “1H-NMR-based analysis for exploring knee synovial fluid metabolite changes after local cryotherapy in knee arthritis patients”

(c)

LS\_aqueux\_0,05.M9 (PLS-DA), cryo J0 vs J1- sans 4,4 à 5,6 ppm  
t[Comp. 1]/t[Comp. 2]  
Colored according to classes in M9

● Day-0  
\* Day-1

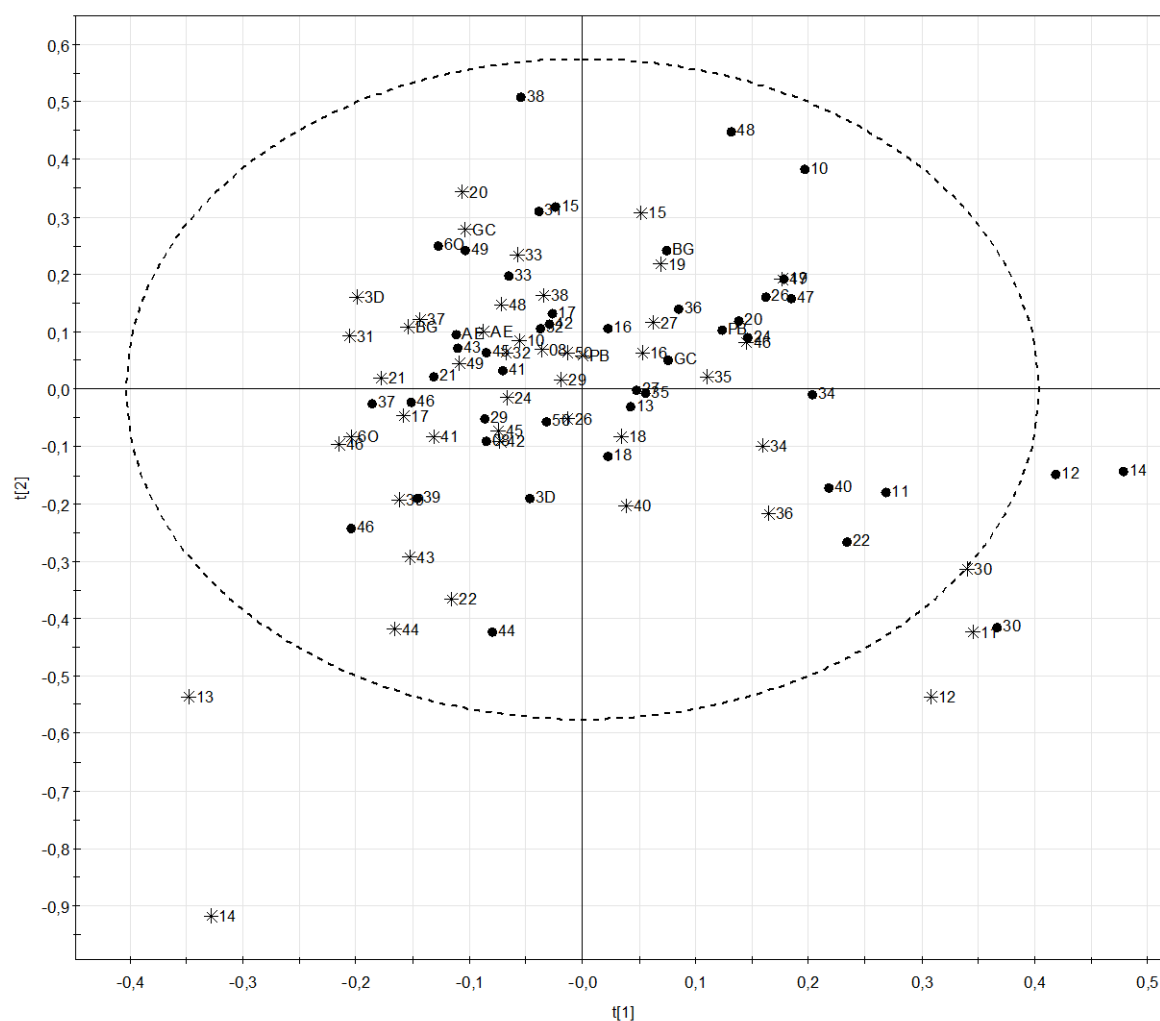

R2X[1] = 0,16495

R2X[2] = 0,187242

Ellipse: Hotelling T2 (0,95)

SIMCA-P 11 - 02/10/2020 10:12:05

Supplementary data for “<sup>1</sup>H-NMR-based analysis for exploring knee synovial fluid metabolite changes after local cryotherapy in knee arthritis patients”

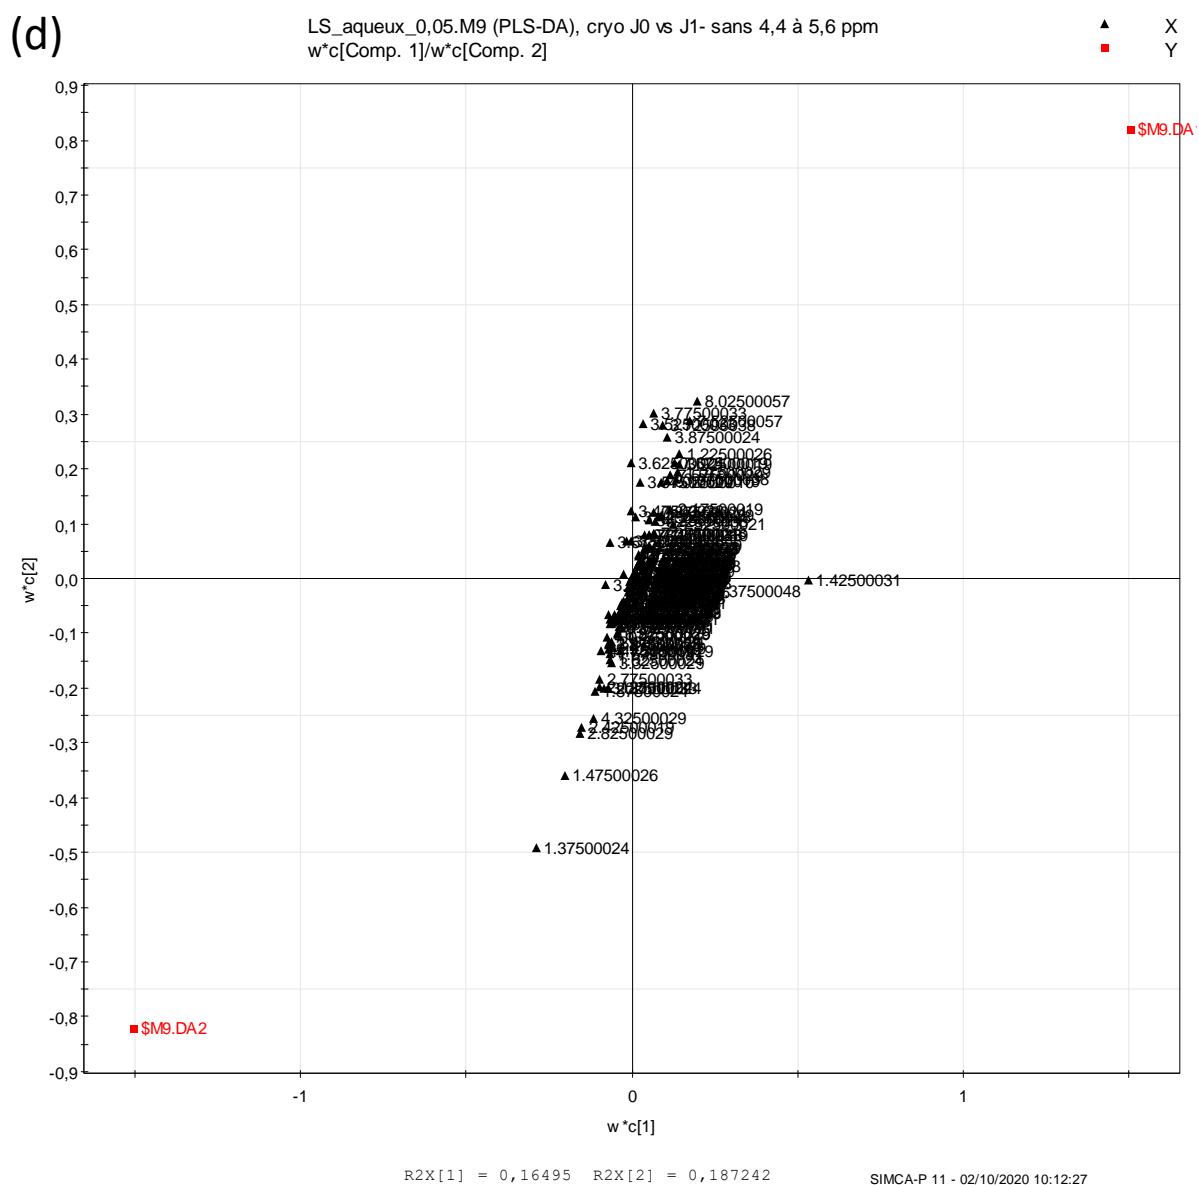

Supplementary data for “<sup>1</sup>H-NMR-based analysis for exploring knee synovial fluid metabolite changes after local cryotherapy in knee arthritis patients”

**SD3 Multivariate analysis results on aqueous samples from manual integration**

- (a) PCA score plot
- (b) PCA loading plot
- (c) PLS-DA score plot
- (d) PLS-DA loading plot

# Supplementary data for “<sup>1</sup>H-NMR-based analysis for exploring knee synovial fluid metabolite changes after local cryotherapy in knee arthritis patients”

(a)

LS\_aqueux\_manuel\_tout.M3 (PCA-X), Cryo J0 vs J1\_manuel  
t[Comp. 1]/t[Comp. 2]  
Colored according to classes in M3

● Day-0  
\* Day-1

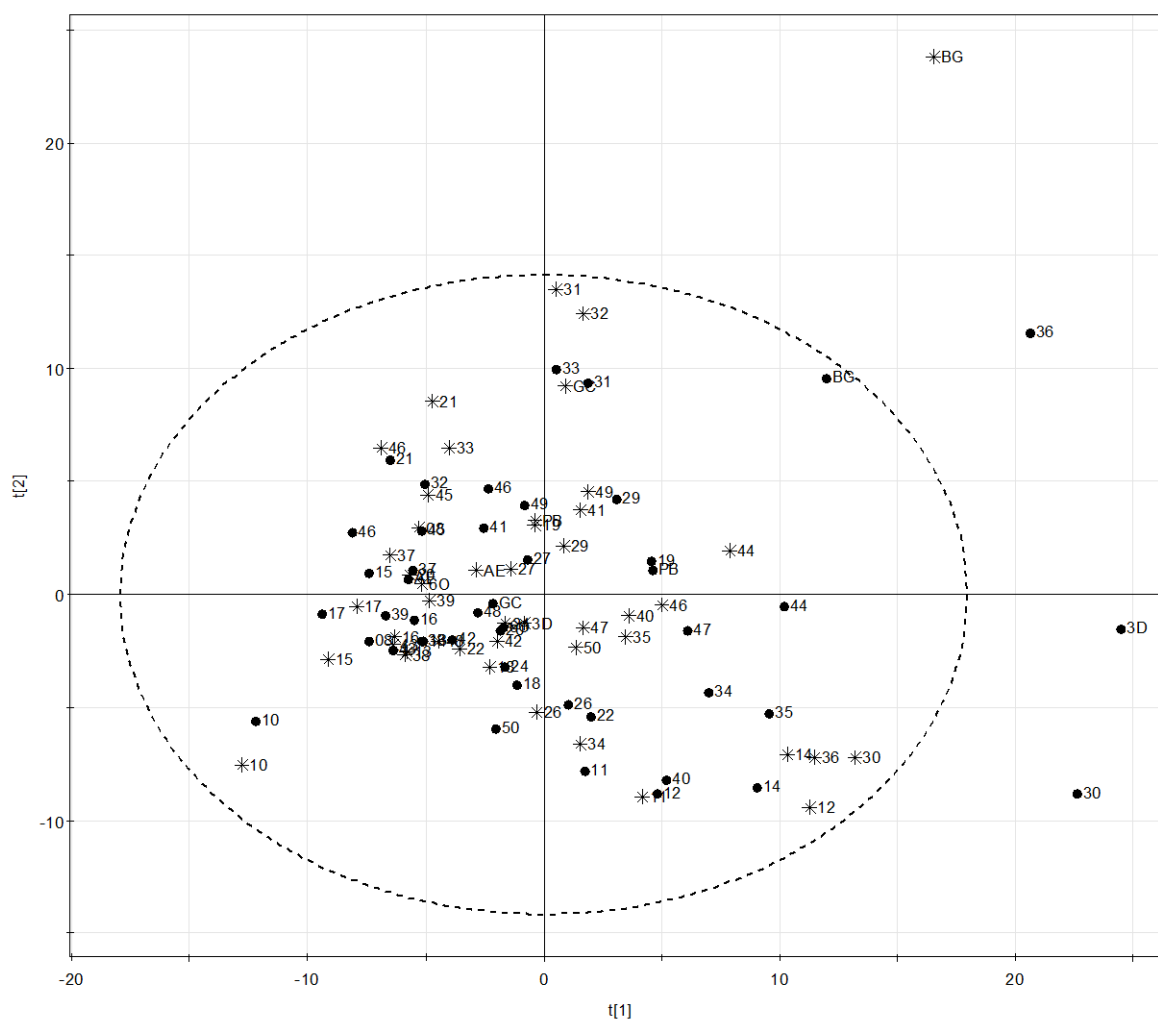

R2X[1] = 0,432586

R2X[2] = 0,268268

Ellipse: Hotelling T2 (0,95)

SIMCA-P 11 - 02/10/2020 10:02:30



Supplementary data for “<sup>1</sup>H-NMR-based analysis for exploring knee synovial fluid metabolite changes after local cryotherapy in knee arthritis patients”

(b)

LS\_aqueux\_manuel\_tout.M3 (PCA-X), Cryo J0 vs J1\_manuel  
p[Comp. 1]/p[Comp. 2]

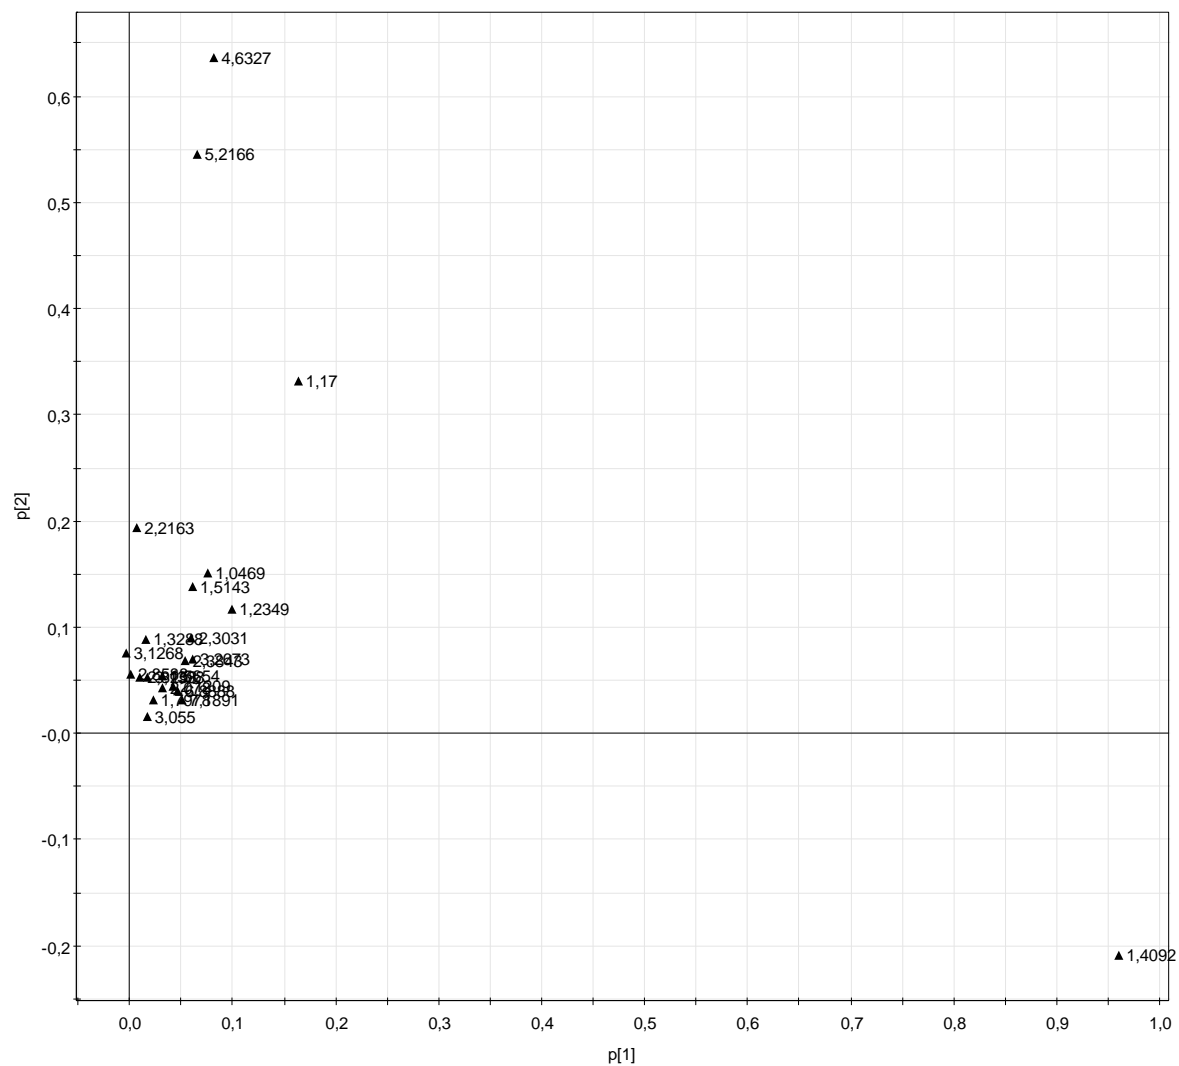

R2X[1] = 0,432586 R2X[2] = 0,268268

SIMCA-P 11 - 02/10/2020 10:04:18

(c) LS\_aqueux\_manuel\_tout.M6 (PLS-DA), Cryo J0 vs J1\_manuel  
t[Comp. 1]/t[Comp. 2]  
Colored according to classes in M6

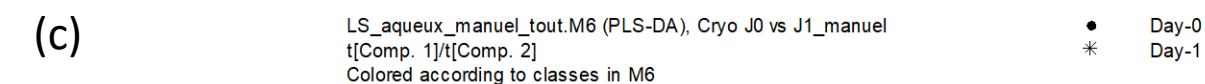

Supplementary data for “<sup>1</sup>H-NMR-based analysis for exploring knee synovial fluid metabolite changes after local cryotherapy in knee arthritis patients”

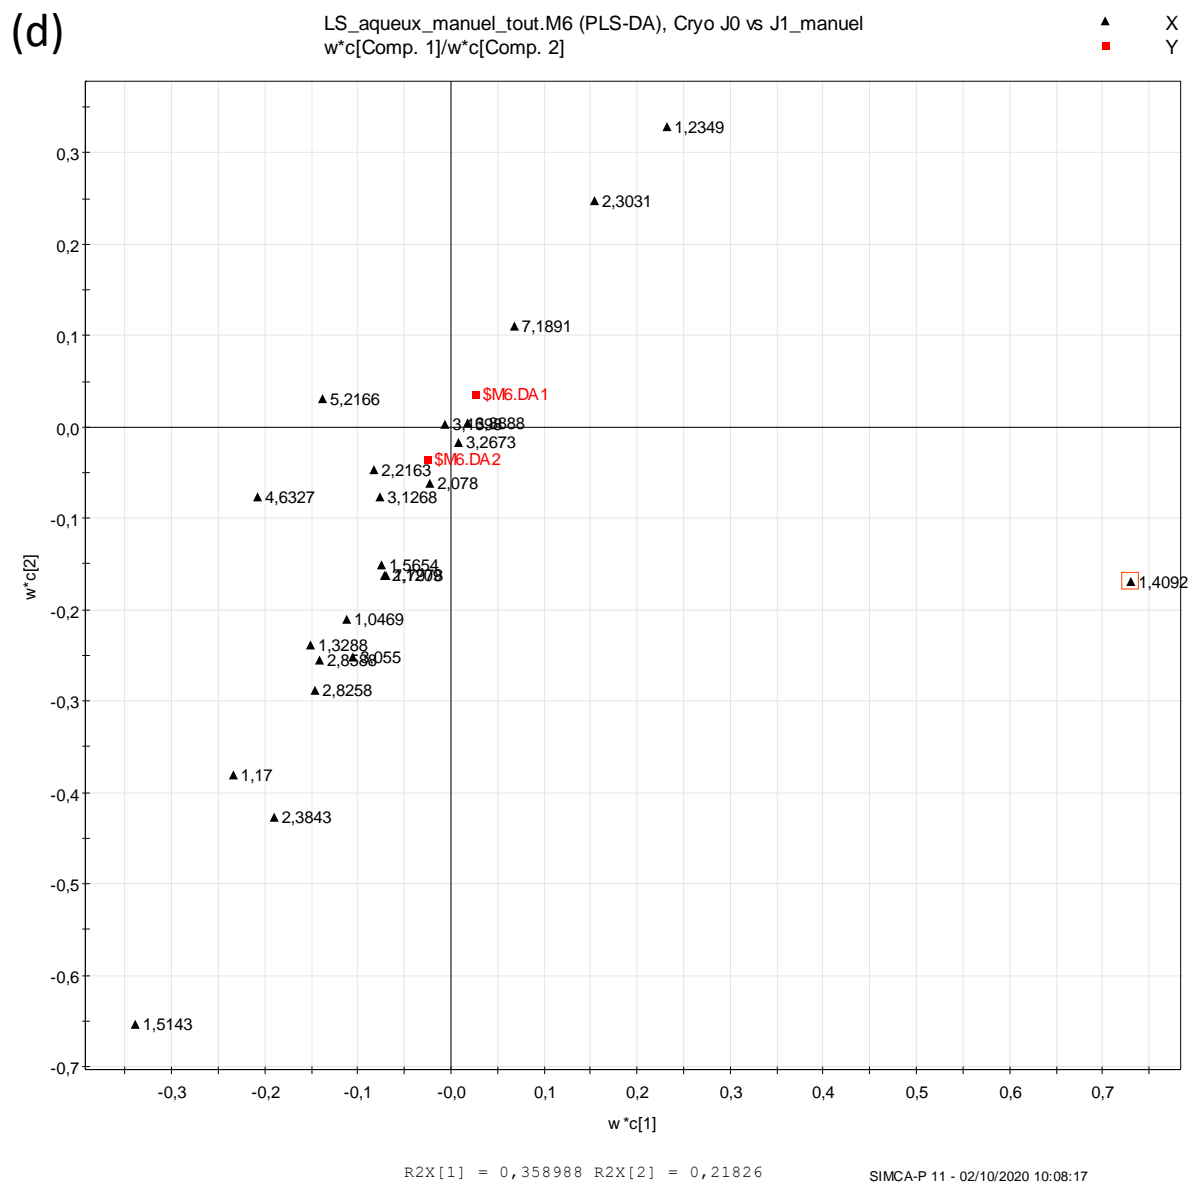

Supplementary data for “<sup>1</sup>H-NMR-based analysis for exploring knee synovial fluid metabolite changes after local cryotherapy in knee arthritis patients”

**SD4 Multivariate analysis results on organic extracts from automatic bucketing**

- (a) PCA score plot
- (b) PCA loading plot
- (c) PLS-DA score plot
- (d) PLS-DA loading plot

# Supplementary data for “1H-NMR-based analysis for exploring knee synovial fluid metabolite changes after local cryotherapy in knee arthritis patients”

(a)

LS\_orga\_0,05\_r.M4 (PCA-X), J0\_cryo vs J1\_cryo exclusion 1.72 1.77  
t[Comp. 1]/t[Comp. 2]  
Colored according to classes in M4

● Day-0  
\* Day-1

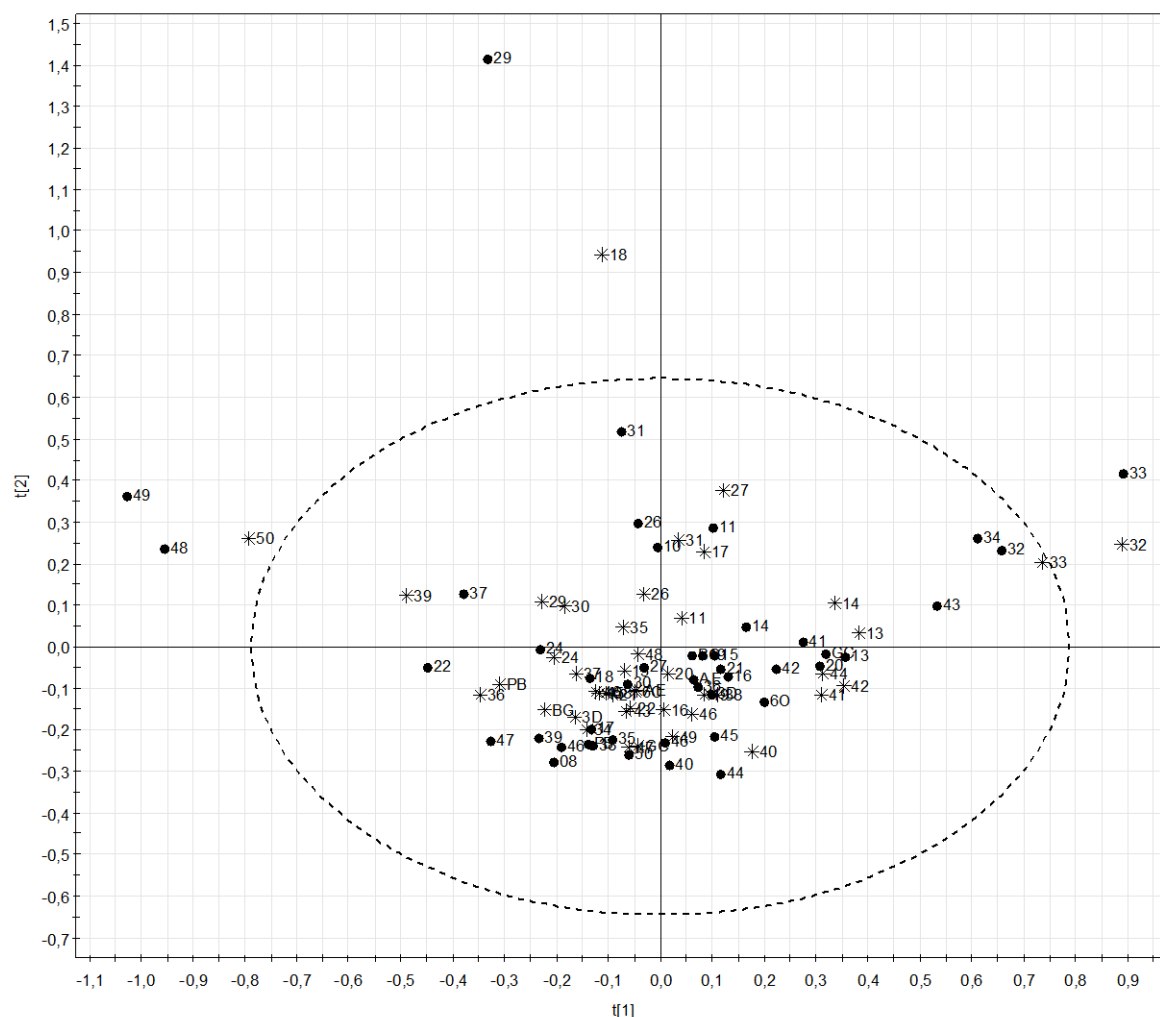

R2X[1] = 0,407488

R2X[2] = 0,272856

Ellipse: Hotelling T2 (0,95)

SIMCA-P 11 - 02/10/2020 10:27:51

# Supplementary data for “1H-NMR-based analysis for exploring knee synovial fluid metabolite changes after local cryotherapy in knee arthritis patients”

(b)

LS\_orga\_0,05\_r.M4 (PCA-X), J0\_cryo vs J1\_cryo exclusion 1.72 1.77  
p[Comp. 1]/p[Comp. 2]

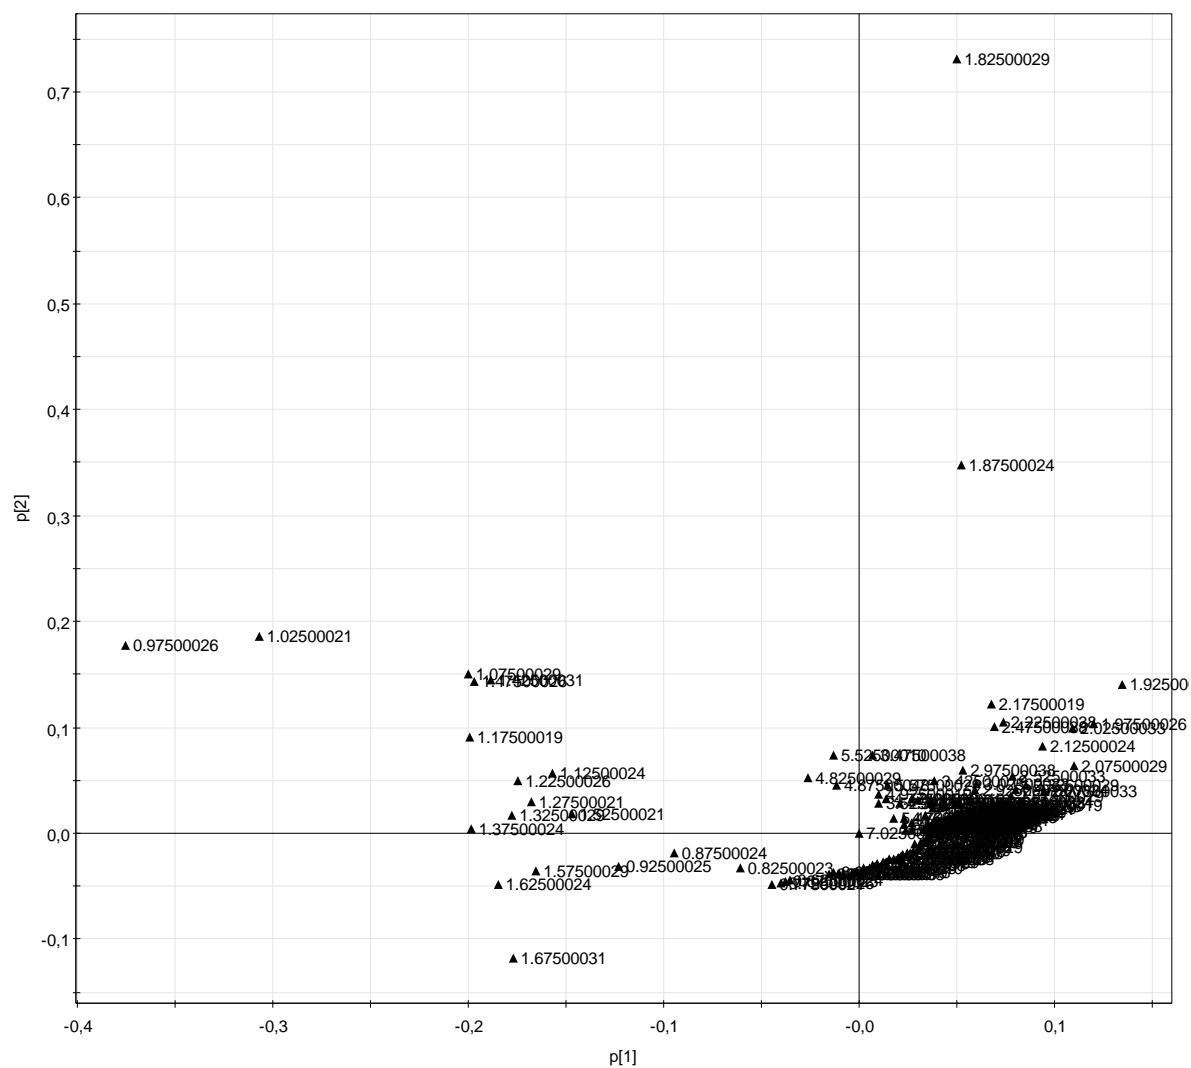

Supplementary data for “<sup>1</sup>H-NMR-based analysis for exploring knee synovial fluid metabolite changes after local cryotherapy in knee arthritis patients”

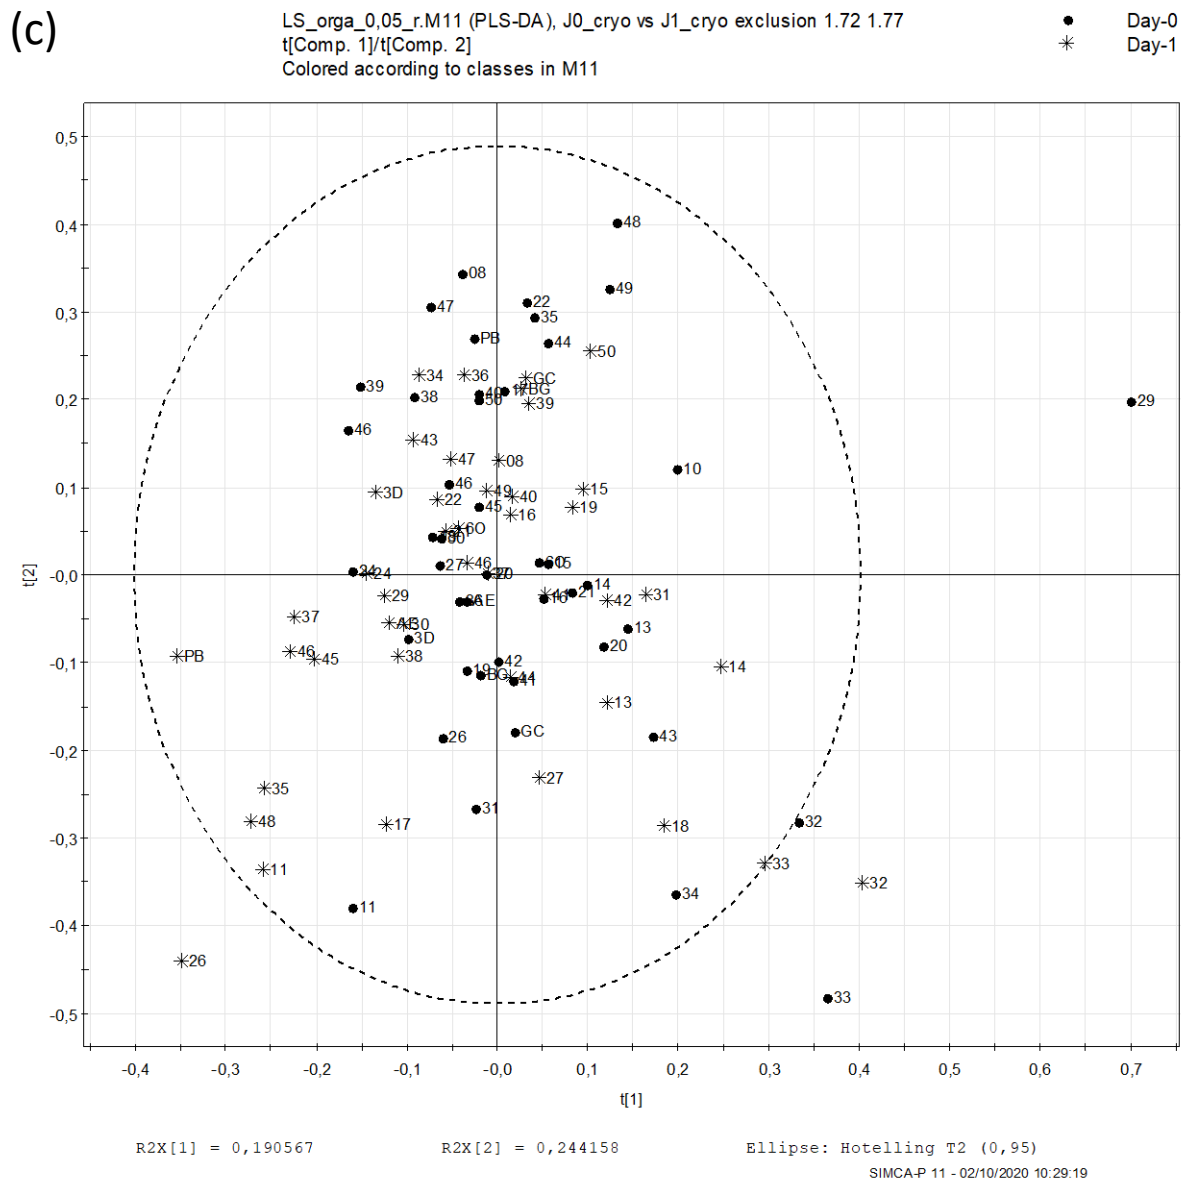

Supplementary data for “<sup>1</sup>H-NMR-based analysis for exploring knee synovial fluid metabolite changes after local cryotherapy in knee arthritis patients”

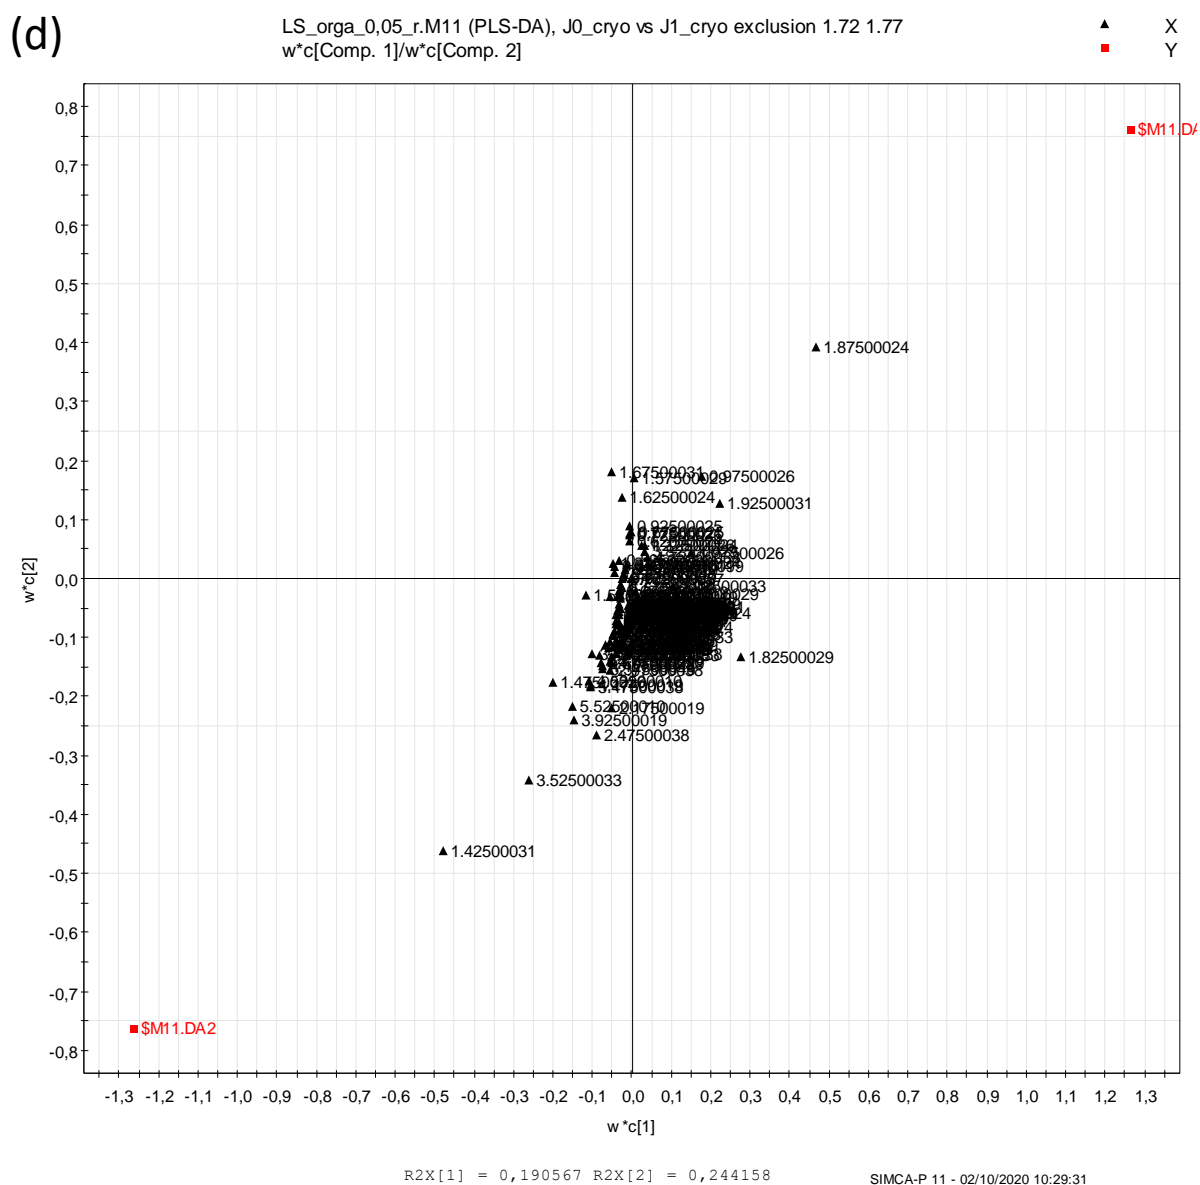



Supplementary data for “<sup>1</sup>H-NMR-based analysis for exploring knee synovial fluid metabolite changes after local cryotherapy in knee arthritis patients”

**SD5 Multivariate analysis results on organic extracts from manual integration**

- (a) PCA score plot
- (b) PCA loading plot
- (c) PLS-DA score plot
- (d) PLS-DA loading plot

# Supplementary data for “1H-NMR-based analysis for exploring knee synovial fluid metabolite changes after local cryotherapy in knee arthritis patients”

(a)

FichiersPourSimcaP\_orga\_manuel\_tout\_v1.M3 (PCA-X), J0 cryo vs J1 cryo manuelle  
t[Comp. 1]/t[Comp. 2]  
Colored according to classes in M3

● Day-0  
\* Day-1

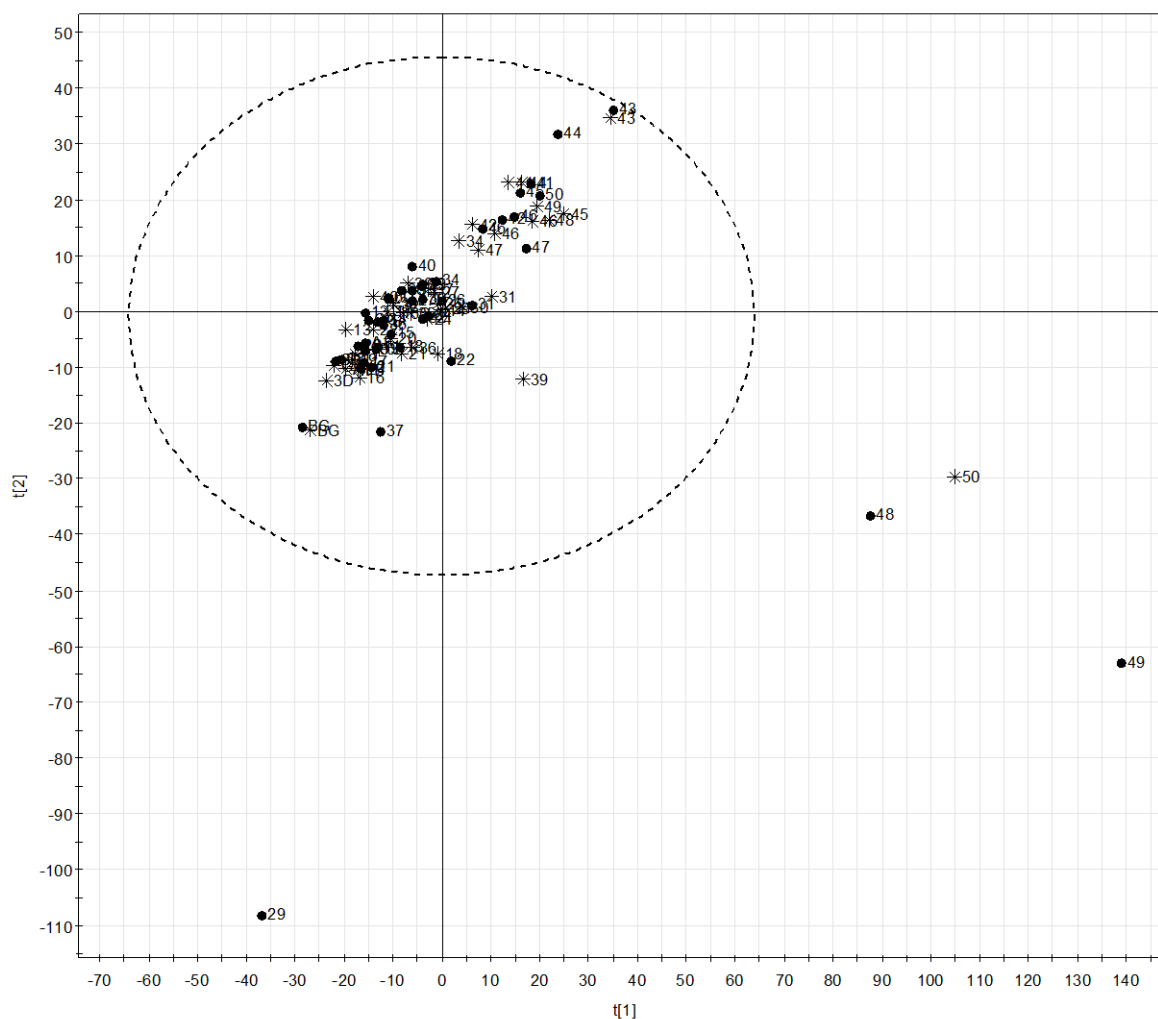

R2X[1] = 0,571299

R2X[2] = 0,295273

Ellipse: Hotelling T2 (0,95)

SIMCA-P 11 - 02/10/2020 10:18:44

Supplementary data for “1H-NMR-based analysis for exploring knee synovial fluid metabolite changes after local cryotherapy in knee arthritis patients”

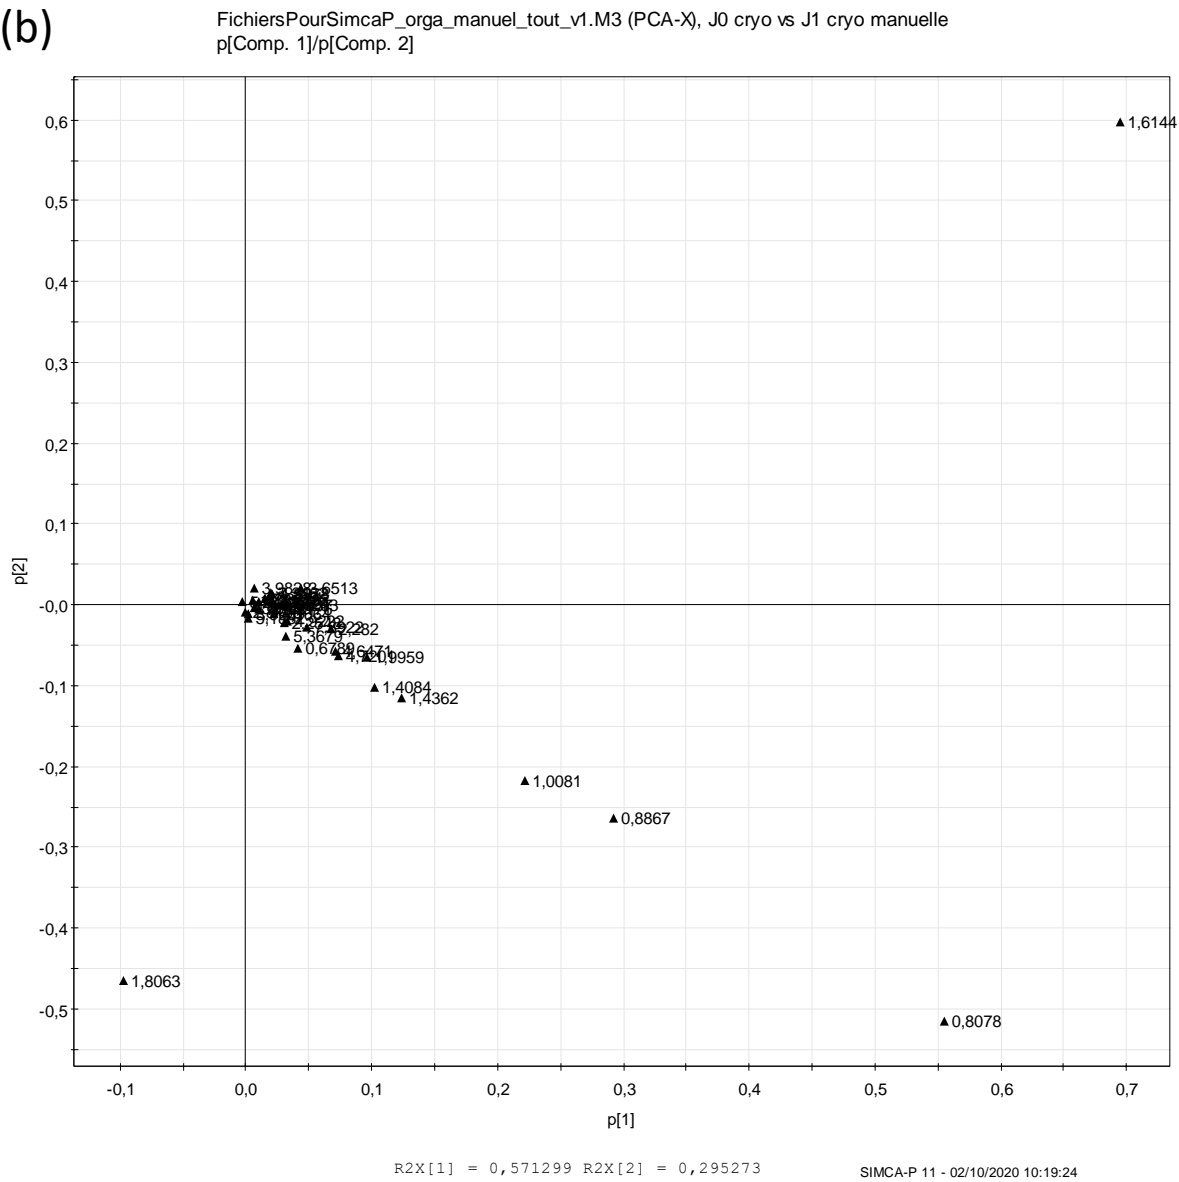

# Supplementary data for “1H-NMR-based analysis for exploring knee synovial fluid metabolite changes after local cryotherapy in knee arthritis patients”

(c)

FichiersPourSimcaP\_orga\_manuel\_tout\_v1.M9 (PLS-DA), J0 cryo vs J1 cryo manuelle  
t[Comp. 1]/t[Comp. 2]  
Colored according to classes in M9

● Day-0  
\* Day-1

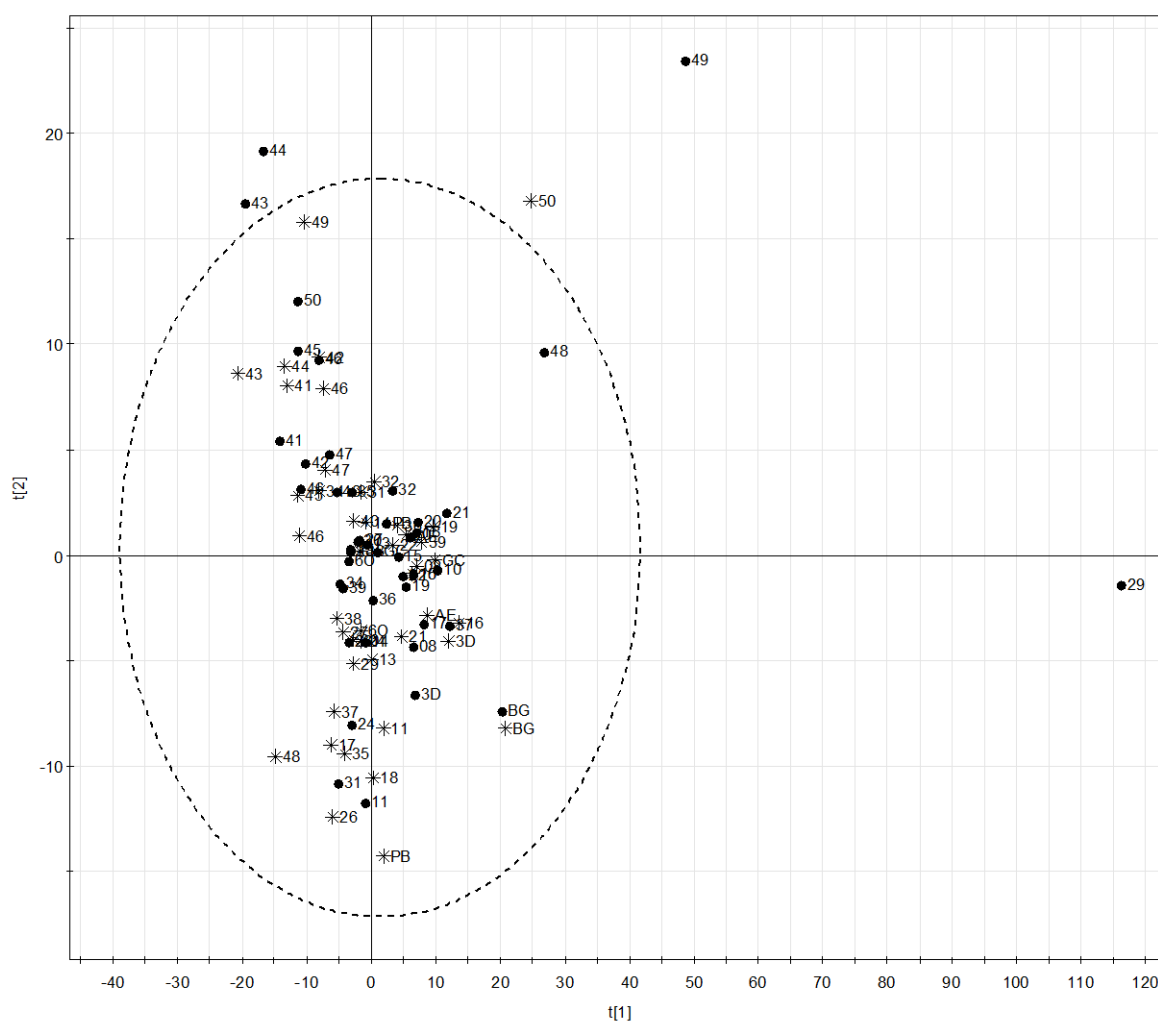

R2X[1] = 0,274744

R2X[2] = 0,267096

Ellipse: Hotelling T2 (0,95)

SIMCA-P 11 - 02/10/2020 10:24:50

# Supplementary data for “<sup>1</sup>H-NMR-based analysis for exploring knee synovial fluid metabolite changes after local cryotherapy in knee arthritis patients”

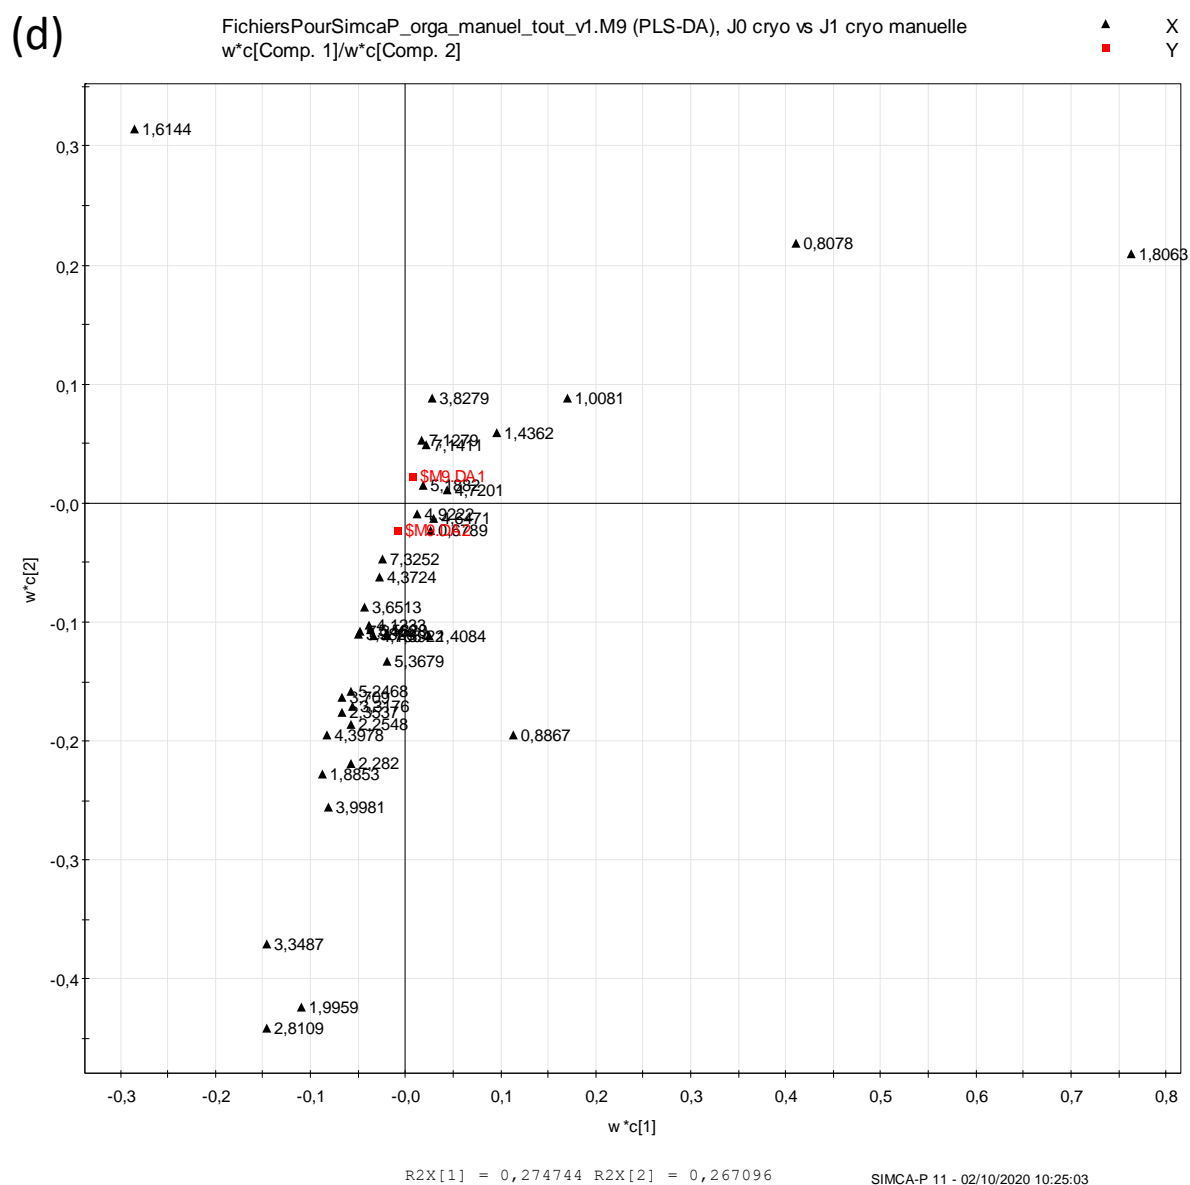

## Supplementary data for “<sup>1</sup>H-NMR-based analysis for exploring knee synovial fluid metabolite changes after local cryotherapy in knee arthritis patients”

### **SD6 – Comparison of 2 quantification methods: reference (TSP) with sample or reference in a insert**

We mixed 3 SF randomly chosen in our bank of samples. The NMR tube preparation was the same as described in experimental methods except the addition of a quantification reference, the TSP. For this last step, we prepared four tube as described below:

#### **TSP with sample**

##### ***Tube 1a***

250 µL of pooled filtrate were mixed with 250 µL of deuterium oxide and 25 µL of deuterium oxide containing TSP.

500 µL were introduced in a 5mm pyrex NMR sample tube.

50 µL of deuterium oxide were added in an insert which was put in the NMR tube.

##### ***Tube 1b***

250 µL of 3 mM creatine solution diluted as aqueous samples were mixed with 250 µL of deuterium oxide and 25 µL of deuterium oxide containing TSP.

500 µL were introduced in a 5mm pyrex NMR sample tube.

50 µL of deuterium oxide were added in an insert which was put in the NMR tube.

#### **TSP in an insert**

##### ***Tube 2a***

250 µL of pooled filtrate were mixed with 275 µL of deuterium oxide.

500 µL were introduced in a 5mm pyrex NMR sample tube.

25 µL of deuterium oxide and 25 µL of deuterium oxide containing TSP were added in an insert which was put in the NMR tube.

##### ***Tube 2b***

250 µL of 3 mM creatine solution diluted as aqueous samples were mixed with 275 µL of deuterium oxide

500 µL were introduced in a 5mm pyrex NMR sample tube.

25 µL of deuterium oxide and 25 µL of deuterium oxide containing TSP were added in an insert which was put in the NMR tube.

Quantification of tube 1a was performed relatively to tube 1b and quantification of tube 2a was performed relatively to tube 2b. The results were obtained in accordance with formulae described in experimental section and are presented below. Depending on each metabolite, we observed difference from 0 to 20 %, in a positive or a negative ways; we can think that those differences are mainly due to residual error due to integration and not to binding molecules to TSP.

Supplementary data for “<sup>1</sup>H-NMR-based analysis for exploring knee synovial fluid metabolite changes after local cryotherapy in knee arthritis patients”

**Table SD6.** Concentration (mM) of metabolites of one SF sample calculated using two methods : reference mixed with the SF and reference in an insert.

| Names             | Method          |                  | (TSP with sample-TSP<br>in an insert) / TSP with<br>sample |
|-------------------|-----------------|------------------|------------------------------------------------------------|
|                   | TSP with sample | TSP in an insert |                                                            |
| Valine            | 0,68            | 0,66             | 3%                                                         |
| Ethanol           | 0,15            | 0,14             | 6%                                                         |
| 3-hydroxybutyrate | 0,09            | 0,08             | 8%                                                         |
| Threonine         | 0,31            | 0,34             | -12%                                                       |
| Lactate           | 8,37            | 8,18             | 2%                                                         |
| Alanine           | 0,77            | 0,69             | 10%                                                        |
| n-butyrate        | 0,17            | 0,16             | 6%                                                         |
| Acetate           | 0,03            | 0,03             | 17%                                                        |
| NAAG              | 0,10            | 0,11             | -12%                                                       |
| Methionine        | 0,09            | 0,08             | 13%                                                        |
| Acetone           | 0,05            | 0,04             | 7%                                                         |
| Acetoacetate      | 0,11            | 0,10             | 10%                                                        |
| Pyruvate          | 0,16            | 0,15             | 4%                                                         |
| Citrate           | 0,06            | 0,06             | 2%                                                         |
| Creatinine        | 0,07            | 0,07             | 5%                                                         |
| Dimethylsulfone   | 0,08            | 0,08             | 1%                                                         |
| Ethanolamine      | 0,08            | 0,08             | -3%                                                        |
| Betaine           | 0,09            | 0,09             | 2%                                                         |
| β-glucose         | 9,26            | 10,58            | -14%                                                       |
| α-glucose         | 4,94            | 5,16             | -4%                                                        |
| Tyrosine          | 0,18            | 0,18             | 1%                                                         |
